# Supplementary material for: Geochemistry of Neoproterozoic metasedimentary rocks from the Mai Kenetal-Werii area, northern Ethiopia: implications for provenance and tectonic setting
Source: Research Square preprint supplement (doi:10.21203/rs.3.rs-4029055/v1), 2024-03-13
Supplement: Supplementary file 1 [file a5244f4b8d04d683b6da4445.docx]

Supplementary Table 1 Major, trace, and REE element data of the metasedimentary rocks from the Mai Kenetal-Werii area. Major element data by XRF. Trace element and REE data by ICP-MS

| Sample | MS01 | MS03 | MS04 | MS05 | MS07 | MS08 | MS09 | MS12 | MS13 | MS14 | MS15 | MS18 | MS19 | MS20 | MS21 | MS22 | MS23 | MS24 | UCC |
| --- | --- | --- | --- | --- | --- | --- | --- | --- | --- | --- | --- | --- | --- | --- | --- | --- | --- | --- | --- |
| XRF (wt%) |  |  |  |  |  |  |  |  |  |  |  |  |  |  |  |  |  |  |  |
| SiO2 | 59.24 | 59.59 | 57.38 | 63.43 | 76.22 | 77.80 | 61.21 | 74.83 | 62.59 | 60.31 | 52.47 | 72.99 | 74.64 | 58.31 | 61.46 | 59.8 | 61.3 | 60.2 | 66 |
| TiO2 | 0.85 | 1.00 | 0.98 | 1.03 | 0.49 | 0.76 | 0.83 | 0.93 | 0.82 | 0.76 | 1.25 | 0.64 | 0.39 | 1.04 | 0.63 | 1.0 | 1.03 | 0.76 | 0.5 |
| Al2O3 | 19.40 | 17.47 | 17.77 | 17.83 | 12.92 | 12.48 | 14.73 | 11.44 | 17.15 | 16.48 | 20.10 | 15.03 | 13.37 | 20.55 | 14.78 | 18.55 | 15.55 | 14.05 | 15.2 |
| Fe2O3* | 9.01 | 9.64 | 12.24 | 7.47 | 1.34 | 0.57 | 7.03 | 2.42 | 7.86 | 9.58 | 12.59 | 1.26 | 3.16 | 9.50 | 10.63 | 8.37 | 8.62 | 6.2 | 4.5 |
| MnO | 0.13 | 0.12 | 0.03 | 0.01 | 0.01 | 0.01 | 0.07 | 0.01 | 0.07 | 0.05 | 0.14 | 0.01 | 0.05 | 0.09 | 0.09 | 0.14 | 0.02 | 0.04 | 0.08 |
| MgO | 1.89 | 2.82 | 2.82 | 1.99 | 1.14 | 0.87 | 6.12 | 0.98 | 2.12 | 3.57 | 2.97 | 0.96 | 1.43 | 2.01 | 4.63 | 2.3 | 2.84 | 5.21 | 2.2 |
| CaO | 1.18 | 1.18 | 0.34 | 0.04 | 0.12 | 0.20 | 0.75 | 0.08 | 0.06 | 1.02 | 1.44 | 0.08 | 0.04 | 0.35 | 0.46 | 1.24 | 2.48 | 3.44 | 4.2 |
| Na2O | 1.66 | 1.12 | 0.51 | 0.45 | 0.09 | 0.10 | 0.85 | 0.93 | 0.11 | 2.56 | 0.87 | 0.14 | 0.63 | 1.24 | 0.29 | 3.17 | 0.2 | 1.29 | 3.9 |
| K2O | 3.27 | 1.30 | 2.02 | 2.79 | 2.69 | 2.63 | 1.89 | 3.01 | 3.16 | 1.78 | 0.85 | 2.78 | 1.67 | 1.98 | 1.33 | 2.89 | 2.48 | 2.15 | 3.4 |
| P2O5 | 0.32 | 0.41 | 0.04 | 0.03 | 0.01 | 0.05 | 0.25 | 0.06 | 0.06 | 0.11 | 0.46 | 0.03 | 0.02 | 0.09 | 0.17 | 0.22 | 0.14 | 0.22 | 0.17 |
| LOI | 3.15 | 3.52 | 4.28 | 3.60 | 2.66 | 2.65 | 4.50 | 4.24 | 4.52 | 3.23 | 4.58 | 3.21 | 3.02 | 3.84 | 3.95 | 3.53 | 4.96 | 4.93 |  |
| Total | 100.10 | 98.17 | 98.41 | 98.67 | 97.69 | 98.12 | 98.23 | 98.93 | 98.52 | 99.45 | 97.72 | 97.13 | 98.42 | 99.00 | 98.42 | 101.21 | 99.62 | 98.49 | 100.15 |
| ICP-MS (ppm) |  |  |  |  |  |  |  |  |  |  |  |  |  |  |  |  |  |  |  |
| Sc | 17.08 | 25.35 | 24.49 | 28.07 | 11.31 | 17.2 | 19.06 | 15.76 | 20.28 | 17.8 | 29.46 | 17.64 | 12.72 | 28.06 | 17.29 | 20 | 25 | 16 | 13.6 |
| V | 121 | 102 | 109 | 125 | 370 | 282 | 122 | 637 | 99 | 73 | 239 | 2889 | 53 | 127 | 108 | 124 | 116 | 128 | 107 |
| Cr | 56 | 362 | 125 | 132 | 136 | 117 | 179 | 177 | 129 | 311 | 121 | 404 | 75 | 59 | 69 | 30 | 50 | 120 | 83 |
| Co | 19.61 | 23.85 | 10.8 | 12.56 | 2.13 | 0.77 | 19.58 | 1.19 | 8.3 | 12.09 | 33.79 | 0.68 | 1.01 | 22.36 | 18.21 | 16 | 14 | 17 | 17 |
| Ni | 14.25 | 25.28 | 30.63 | 25.34 | 24.1 | 5.58 | 65.01 | 5.15 | 40.44 | 14.45 | 43.55 | 29.47 | 21.3 | 14.31 | 16.8 | 12 | 13 | 55 | 44 |
| Rb | 65.73 | 34.22 | 53.88 | 86.25 | 105.99 | 96.72 | 56.61 | 95.94 | 95.11 | 46.68 | 21.09 | 113.41 | 47.99 | 49.56 | 34.57 | 73.6 | 79.6 | 61.2 | 112 |
| Sr | 211 | 512 | 185 | 137 | 22 | 121 | 45 | 86 | 30 | 99 | 376 | 66 | 250 | 544 | 99 | 324 | 48.9 | 120.5 | 350 |
| Y | 21.76 | 27.8 | 17.71 | 15.55 | 18.99 | 36.26 | 23.89 | 31.1 | 31.68 | 12.13 | 22.68 | 31.19 | 16.26 | 23.35 | 18.73 | 24.8 | 14.2 | 24.6 | 22 |
| Zr | 114 | 109 | 150 | 135 | 197 | 216 | 143 | 214 | 182 | 104 | 89 | 191 | 140 | 138 | 89 | 87 | 129 | 145 | 190 |
| Nb | 5.83 | 5.54 | 11.25 | 7.25 | 8.23 | 12.79 | 7.99 | 12.21 | 8.72 | 5.67 | 4.19 | 10.48 | 6.04 | 8.38 | 5.45 | 2.9 | 4.7 | 6.2 | 12 |
| Cs | 1.1 | 2.02 | 1.97 | 3.31 | 4.6 | 4.88 | 2.22 | 3.82 | 3.35 | 0.89 | 1.58 | 6.8 | 3.28 | 2.64 | 1.37 | 1.29 | 1.6 | 2.14 | 4.6 |
| Ba | 1669 | 806 | 462 | 613 | 745 | 669 | 413 | 1043 | 828 | 469 | 426 | 823 | 542 | 876 | 445 | 2790 | 769 | 773 | 550 |
| La | 28 | 40.25 | 9.64 | 13.46 | 2.84 | 12.78 | 18.64 | 21.22 | 23.42 | 13.3 | 18.93 | 19.28 | 2.83 | 24.43 | 6.23 | 30.3 | 12 | 21.8 | 30 |
| Ce | 52.4 | 64.56 | 7.02 | 16.1 | 4.91 | 28.3 | 36.42 | 43.87 | 36.3 | 30.21 | 36.61 | 35.43 | 4.4 | 54.39 | 25.91 | 54 | 26.3 | 42.6 | 64 |
| Pr | 6.4 | 7.55 | 2.49 | 4.22 | 1.12 | 5.16 | 4.87 | 5.36 | 6.51 | 3.58 | 5.13 | 4.54 | 1.24 | 6.8 | 2.26 | 6.99 | 3.24 | 5.33 | 7.1 |
| Nd | 25.2 | 30.27 | 11.22 | 17.26 | 5.25 | 25.88 | 20.03 | 20.23 | 26.65 | 14.51 | 21.82 | 18.14 | 5.71 | 28.6 | 10.22 | 28 | 14 | 23.3 | 26 |
| Sm | 5.14 | 6.28 | 3.17 | 3.6 | 1.92 | 6.2 | 4.42 | 4 | 5.68 | 3.14 | 4.91 | 5.27 | 1.6 | 6.18 | 2.85 | 5.11 | 3.06 | 4.73 | 4.5 |
| Eu | 1.78 | 2.4 | 1.09 | 1.26 | 0.67 | 1.25 | 0.96 | 1.19 | 1.5 | 0.93 | 1.37 | 1.4 | 0.46 | 1.83 | 0.73 | 1.25 | 0.88 | 1.16 | 0.88 |
| Gd | 5.14 | 6.96 | 3.16 | 3.68 | 1.99 | 5.12 | 4.62 | 4.61 | 5.95 | 2.84 | 4.04 | 4.02 | 1.45 | 5.08 | 2.47 | 4.62 | 2.63 | 4.71 | 3.8 |
| Tb | 0.82 | 1.13 | 0.65 | 0.63 | 0.43 | 1.02 | 0.87 | 0.84 | 1.06 | 0.49 | 0.78 | 0.91 | 0.38 | 0.88 | 0.57 | 0.75 | 0.47 | 0.72 | 0.64 |
| Dy | 3.86 | 5.22 | 3.41 | 3.09 | 2.55 | 5.39 | 4.62 | 4.75 | 5.46 | 2.33 | 3.93 | 5.2 | 2.57 | 4.19 | 3.22 | 4.47 | 3.02 | 4.71 | 3.5 |
| Ho | 0.77 | 1 | 0.66 | 0.62 | 0.61 | 1.16 | 0.93 | 1.06 | 1.12 | 0.45 | 0.81 | 1.12 | 0.61 | 0.86 | 0.7 | 0.83 | 0.58 | 0.93 | 0.8 |
| Er | 2.35 | 2.86 | 1.94 | 1.93 | 2.1 | 3.67 | 2.84 | 3.4 | 3.32 | 1.34 | 2.32 | 3.43 | 2.09 | 2.61 | 2.14 | 2.46 | 1.7 | 2.73 | 2.3 |
| Tm | 0.31 | 0.36 | 0.27 | 0.26 | 0.34 | 0.53 | 0.39 | 0.49 | 0.45 | 0.18 | 0.31 | 0.51 | 0.35 | 0.36 | 0.32 | 0.28 | 0.27 | 0.37 | 0.33 |
| Yb | 2.08 | 2.44 | 1.87 | 1.83 | 2.54 | 3.66 | 2.65 | 3.4 | 2.94 | 1.17 | 2.01 | 3.42 | 2.51 | 2.53 | 2.11 | 1.9 | 1.75 | 2.68 | 2.2 |
| Lu | 0.31 | 0.36 | 0.28 | 0.28 | 0.44 | 0.57 | 0.4 | 0.53 | 0.43 | 0.17 | 0.31 | 0.55 | 0.43 | 0.4 | 0.33 | 0.24 | 0.24 | 0.42 | 0.32 |
| Hf | 3.17 | 3.15 | 3.82 | 3.58 | 3.72 | 4.85 | 3.93 | 5.76 | 4.56 | 2.76 | 2.57 | 4.47 | 3.67 | 3.95 | 2.56 | 2.4 | 3.5 | 4.4 | 5.8 |
| Ta | 0.81 | 0.75 | 3.03 | 6.4 | 0.75 | 1.35 | 0.67 | 1.18 | 0.71 | 1.13 | 0.3 | 1.02 | 0.68 | 1.74 | 0.88 | 0.2 | 0.3 | 0.5 | 1 |
| Pb | 6.48 | 6.63 | 2.79 | 2.32 | 2.42 | 9.82 | 6.77 | 20.95 | 4.74 | 7.71 | 2.85 | 8.19 | 2.7 | 5.74 | 1.9 | 9 | 4 | 15 | 17 |
| Th | 2.75 | 2.74 | 2.99 | 3.15 | 6.4 | 9.03 | 4.02 | 8.87 | 5.36 | 2.33 | 2 | 8.31 | 3.82 | 4.37 | 2.57 | 2.16 | 3.4 | 4.17 | 10.7 |
| U | 1.21 | 1.09 | 0.62 | 0.67 | 4.22 | 5.42 | 1.23 | 8.69 | 1.17 | 0.38 | 0.88 | 39.32 | 1.36 | 1.17 | 0.59 | 1.11 | 0.41 | 1.62 | 2.8 |
| Al2O3/TiO2 | 22.82 | 17.47 | 18.13 | 17.31 | 26.37 | 16.42 | 17.75 | 12.3 | 20.92 | 21.68 | 16.08 | 23.48 | 34.28 | 19.76 | 23.46 | 18.55 | 15.1 | 18.49 | 30.4 |
| Th/Sc | 0.16 | 0.11 | 0.12 | 0.11 | 0.57 | 0.53 | 0.21 | 0.57 | 0.26 | 0.13 | 0.07 | 0.47 | 0.3 | 0.16 | 0.15 | 0.11 | 0.14 | 0.26 | 0.79 |
| La/Sc | 1.64 | 1.59 | 0.39 | 0.48 | 0.25 | 0.74 | 0.98 | 1.35 | 1.15 | 0.75 | 0.64 | 1.09 | 0.22 | 0.87 | 0.36 | 1.52 | 0.48 | 1.36 | 2.21 |
| La/Co | 1.43 | 1.69 | 0.89 | 1.07 | 1.33 | 16.6 | 0.95 | 17.83 | 2.82 | 1.1 | 0.56 | 28.35 | 2.8 | 1.09 | 0.34 | 1.89 | 0.86 | 1.28 | 1.76 |
| Th/Co | 0.14 | 0.11 | 0.28 | 0.25 | 3 | 11.73 | 0.21 | 7.45 | 0.65 | 0.19 | 0.06 | 12.22 | 3.78 | 0.2 | 0.14 | 0.14 | 0.24 | 0.25 | 0.63 |
| Zr/Sc | 6.7 | 4.29 | 6.14 | 4.82 | 17.41 | 12.55 | 7.52 | 13.58 | 8.99 | 5.83 | 3 | 10.84 | 11.04 | 4.92 | 5.15 | 4.35 | 5.16 | 9.06 | 13.97 |
| La/Th | 10.18 | 14.69 | 3.22 | 4.27 | 0.44 | 1.42 | 4.64 | 2.39 | 4.37 | 5.71 | 9.47 | 2.32 | 0.74 | 5.59 | 2.42 | 14.03 | 3.53 | 5.23 | 2.8 |
| Th/U | 2.27 | 2.51 | 4.82 | 4.7 | 1.52 | 1.67 | 3.27 | 1.02 | 4.58 | 6.13 | 2.27 | 0.21 | 2.81 | 3.74 | 4.36 | 1.95 | 8.29 | 2.57 | 3.81 |
| Eu/Eu* | 1.06 | 1.11 | 1.05 | 1.06 | 1.05 | 0.68 | 0.65 | 0.85 | 0.79 | 0.95 | 0.94 | 0.93 | 0.92 | 1 | 0.84 | 0.79 | 0.95 | 0.75 | 0.65 |
| LaN/SmN | 3.43 | 4.03 | 1.91 | 2.35 | 0.93 | 1.3 | 2.65 | 3.34 | 2.59 | 2.66 | 2.43 | 2.3 | 1.11 | 2.49 | 1.38 | 3.73 | 2.47 | 2.9 | 4.19 |
| LaN/YbN | 9.08 | 11.12 | 3.48 | 4.96 | 0.75 | 2.35 | 4.74 | 4.21 | 5.37 | 7.66 | 6.35 | 3.8 | 0.76 | 6.51 | 1.99 | 10.75 | 4.62 | 5.48 | 9.19 |
| GdN/YbN | 1.99 | 2.3 | 1.36 | 1.62 | 0.63 | 1.13 | 1.41 | 1.09 | 1.63 | 1.96 | 1.62 | 0.95 | 0.47 | 1.62 | 0.94 | 1.96 | 1.21 | 1.42 | 1.39 |
| CIA | 71.7 | 79.81 | 83.39 | 82.56 | 79.74 | 79.77 | 79.85 | 70.44 | 82.78 | 68.08 | 83.79 | 81.92 | 82.31 | 81.67 | 86.12 | 64.79 | 68.42 | 57.96 | 46.73 |
| PIA | 79.39 | 84.21 | 91.99 | 95.19 | 96.46 | 96.17 | 88.32 | 84.17 | 98.91 | 71.51 | 86.59 | 97.49 | 91.55 | 88.17 | 93.39 | 68.91 | 74.1 | 59.85 | 45.77 |
| CIW | 82.49 | 85.3 | 92.91 | 95.97 | 97.24 | 96.99 | 89.77 | 88.15 | 99.13 | 73.97 | 87.12 | 97.98 | 92.6 | 89.27 | 93.99 | 72.72 | 77.57 | 64.11 | 52.69 |
| ICV | 0.99 | 1.1 | 1.05 | 0.77 | 0.54 | 0.48 | 1.69 | 0.78 | 0.83 | 1.41 | 1.03 | 0.44 | 0.65 | 0.78 | 1.45 | 1.18 | 1.3 | 1.99 | 1.73 |
